# Supplementary material for: Dietary antioxidant vitamins intake and mortality: A report from two cohort studies of Chinese adults in Shanghai
Source: PubMed Central journal article supplement — J Epidemiol. 2016 Dec 26;27(3):89–97. doi: 10.1016/j.je.2016.10.002 (PMC5363781; doi:10.1016/j.je.2016.10.002), 2016-12-26
Supplement: mmc1.pdf [file mmc1.pdf]

**eTable 1.** Baseline characteristics of study population according to dietary carotene intake in men (2002-2012) and women (1997-2012)

|                                          | Men, Mean (SD) or N (%) |               |               |               |               | Women, Mean (SD) or N (%) |               |               |               |               |
|------------------------------------------|-------------------------|---------------|---------------|---------------|---------------|---------------------------|---------------|---------------|---------------|---------------|
|                                          | Q1 (lowest)             | Q2            | Q3            | Q4            | Q5 (highest)  | Q1 (lowest)               | Q2            | Q3            | Q4            | Q5 (highest)  |
| N                                        | 11,947                  | 11,949        | 11,947        | 11,948        | 11,948        | 14,924                    | 14,923        | 14,925        | 14,924        | 14,923        |
| Education                                |                         |               |               |               |               |                           |               |               |               |               |
| Elementary school or less                | 1,092 (9.14)            | 842 (7.05)    | 781 (6.54)    | 666 (5.57)    | 601 (5.03)    | 4,218 (28.26)             | 3,438 (23.04) | 2,893 (19.38) | 2,909 (19.49) | 2,618 (17.54) |
| Middle school                            | 4,479 (37.49)           | 4,090 (34.23) | 3,961 (33.15) | 3,820 (31.97) | 3,646 (30.52) | 5,498 (36.84)             | 5,395 (36.15) | 5,521 (36.99) | 5,633 (37.74) | 5,526 (37.03) |
| High school                              | 4,205 (35.2)            | 4,359 (36.48) | 4,328 (36.23) | 4,371 (36.58) | 4,329 (36.23) | 3,528 (23.64)             | 4,061 (27.21) | 4,340 (29.08) | 4,263 (28.56) | 4,627 (31.01) |
| Professional education/college or higher | 2,171 (18.17)           | 2,658 (22.24) | 2,877 (24.08) | 3,091 (25.87) | 3,372 (28.22) | 1,680 (11.26)             | 2,029 (13.6)  | 2,171 (14.55) | 2,119 (14.2)  | 2,152 (14.42) |
| Income <sup>a</sup>                      |                         |               |               |               |               |                           |               |               |               |               |
| Low                                      | 1,920 (16.07)           | 1,493 (12.49) | 1,439 (12.04) | 1,292 (10.81) | 1,330 (11.13) | 2,596 (17.39)             | 2,275 (15.24) | 2,284 (15.3)  | 2,394 (16.04) | 2,523 (16.91) |
| Lower middle                             | 5,458 (45.69)           | 5,203 (43.54) | 5,053 (42.3)  | 4,942 (41.36) | 4,833 (40.45) | 5,879 (39.39)             | 5,590 (37.46) | 5,630 (37.72) | 5,631 (37.73) | 5,810 (38.93) |
| Upper middle                             | 3,705 (31.01)           | 4,210 (35.23) | 4,261 (35.67) | 4,439 (37.15) | 4,361 (36.5)  | 4,194 (28.1)              | 4,373 (29.3)  | 4,217 (28.25) | 4,255 (28.51) | 3,920 (26.27) |
| High                                     | 864 (7.23)              | 1,043 (8.73)  | 1,194 (9.99)  | 1,275 (10.67) | 1,424 (11.92) | 2,255 (15.11)             | 2,685 (17.99) | 2,794 (18.72) | 2,644 (17.72) | 2,670 (17.89) |
| Occupation                               |                         |               |               |               |               |                           |               |               |               |               |
| House wife                               | -                       | -             | -             | -             | -             | 73 (0.49)                 | 60 (0.4)      | 45 (0.3)      | 52 (0.35)     | 44 (0.29)     |
| Professional, administrator              | 2,538 (21.24)           | 3,027 (25.33) | 3,207 (26.84) | 3,333 (27.9)  | 3,607 (30.19) | 3,641 (24.4)              | 4,266 (28.59) | 4,474 (29.98) | 4,459 (29.88) | 4,489 (30.08) |
| Clerical or service worker               | 2,470 (20.67)           | 2,622 (21.94) | 2,637 (22.07) | 2,691 (22.52) | 2,699 (22.59) | 3,041 (20.38)             | 3,000 (20.1)  | 3,060 (20.5)  | 3,106 (20.81) | 3,201 (21.45) |
| Manual laborer                           | 6,939 (58.08)           | 6,300 (52.72) | 6,103 (51.08) | 5,924 (49.58) | 5,642 (47.22) | 8,169 (54.74)             | 7,597 (50.91) | 7,346 (49.22) | 7,307 (48.96) | 7,189 (48.17) |
| History of hypertension                  | 3,324 (27.82)           | 3,528 (29.53) | 3,538 (29.61) | 3,646 (30.52) | 3,743 (31.33) | 3,561 (23.86)             | 3,522 (23.6)  | 3,421 (22.92) | 3,585 (24.02) | 3,656 (24.5)  |
| History of diabetes                      | 594 (4.97)              | 685 (5.73)    | 735 (6.15)    | 760 (6.36)    | 957 (8.01)    | 706 (4.73)                | 635 (4.26)    | 566 (3.79)    | 654 (4.38)    | 711 (4.76)    |
| History of coronary heart disease        | 530 (4.44)              | 591 (4.95)    | 572 (4.79)    | 636 (5.32)    | 701 (5.87)    | 1,038 (6.96)              | 1,048 (7.02)  | 1,081 (7.24)  | 1,113 (7.46)  | 1,217 (8.16)  |
| History of stroke                        | 463 (3.88)              | 469 (3.93)    | 420 (3.52)    | 432 (3.62)    | 449 (3.76)    | 190 (1.27)                | 172 (1.15)    | 163 (1.09)    | 170 (1.14)    | 177 (1.19)    |
| Smoke status <sup>b</sup>                |                         |               |               |               |               |                           |               |               |               |               |
| Never smoker                             | 2,996 (25.08)           | 3,446 (28.84) | 3,680 (30.8)  | 3,844 (32.17) | 4,185 (35.03) | 14,324                    | 14,501        | 14,559        | 14,594        | 14,567        |

|                                          |                   |                   |                   |                   |                   |                   |                   |                   |                   |                   |         |
|------------------------------------------|-------------------|-------------------|-------------------|-------------------|-------------------|-------------------|-------------------|-------------------|-------------------|-------------------|---------|
|                                          |                   |                   |                   |                   |                   |                   | (95.98)           | (97.17)           | (97.55)           | (97.79)           | (97.61) |
| Pack-years <20                           | 3,425 (28.67)     | 3,769 (31.54)     | 3,697 (30.95)     | 3,771 (31.56)     | 3,600 (30.13)     | 600 (4.02)        | 422 (2.83)        | 366 (2.45)        | 330 (2.21)        | 356 (2.39)        |         |
| Pack-years ≥20                           | 5,526 (46.25)     | 4,734 (39.62)     | 4,570 (38.25)     | 4,333 (36.27)     | 4,163 (34.84)     | -                 | -                 | -                 | -                 | -                 |         |
| Alcohol intake                           |                   |                   |                   |                   |                   |                   |                   |                   |                   |                   |         |
| Never drinker                            | 7,914 (66.24)     | 7,899 (66.11)     | 8,056 (67.43)     | 7,957 (66.6)      | 7,984 (66.82)     | 14,631 (98.04)    | 14,655 (98.2)     | 14,644 (98.12)    | 14,635 (98.06)    | 14,614 (97.93)    |         |
| <2 drinks/day                            | 2,273 (19.03)     | 2,419 (20.24)     | 2,401 (20.1)      | 2,498 (20.91)     | 2,386 (19.97)     | 269 (1.8)         | 250 (1.68)        | 272 (1.82)        | 277 (1.86)        | 284 (1.9)         |         |
| ≥2 drinks/day                            | 1,760 (14.73)     | 1,631 (13.65)     | 1,490 (12.47)     | 1,493 (12.5)      | 1,578 (13.21)     | 24 (0.16)         | 18 (0.12)         | 9 (0.06)          | 12 (0.08)         | 25 (0.17)         |         |
| Supplemental vitamins users <sup>c</sup> | 1,308 (10.95)     | 1,668 (13.96)     | 1,836 (15.37)     | 1,916 (16.04)     | 2,275 (19.04)     | 2,307 (15.46)     | 2,824 (18.92)     | 3,032 (20.31)     | 3,082 (20.65)     | 3,462 (23.2)      |         |
| Menopause status                         | -                 | -                 | -                 | -                 | -                 | 8,086 (54.18)     | 7,533 (50.48)     | 7,180 (48.11)     | 7,108 (47.63)     | 7,072 (47.39)     |         |
| Hormone replacement therapy              | -                 | -                 | -                 | -                 | -                 | 225 (1.51)        | 305 (2.04)        | 312 (2.09)        | 335 (2.24)        | 387 (2.59)        |         |
| Age at baseline, years                   | 55.14 (9.83)      | 55.38 (9.83)      | 55.37 (9.72)      | 55.4 (9.67)       | 55.42 (9.63)      | 53.77 (9.34)      | 52.9 (9.19)       | 52.31 (8.98)      | 52.18 (8.93)      | 51.95 (8.82)      |         |
| Body mass index, kg/m <sup>2</sup>       | 23.53 (3.09)      | 23.55 (3.08)      | 23.71 (3.05)      | 23.83 (3.07)      | 23.97 (3.07)      | 24.05 (3.59)      | 23.86 (3.41)      | 23.86 (3.39)      | 24.04 (3.38)      | 24.29 (3.37)      |         |
| Waist-hip ratio                          | 0.9 (0.06)        | 0.9 (0.06)        | 0.9 (0.06)        | 0.9 (0.06)        | 0.9 (0.06)        | 0.82 (0.06)       | 0.81 (0.05)       | 0.81 (0.05)       | 0.81 (0.05)       | 0.81 (0.05)       |         |
| Physical activity, MET-h/week            | 56.52 (33.27)     | 57.19 (32.98)     | 59.16 (33.47)     | 60.7 (33.57)      | 64.68 (36.71)     | 103.57 (44.12)    | 103.87 (44.17)    | 105.35 (44.44)    | 107.3 (45.02)     | 112.15 (47.31)    |         |
| Dietary intake <sup>d</sup>              |                   |                   |                   |                   |                   |                   |                   |                   |                   |                   |         |
| Total energy, kcal/d                     | 2,026.16 (500.61) | 1,850.19 (456.85) | 1,837.73 (444.35) | 1,866.77 (450.84) | 1,963.69 (478.25) | 1,772.05 (413.08) | 1,627.83 (371.35) | 1,616.76 (370.04) | 1,635.58 (370.86) | 1,721.75 (409.63) |         |
| Carbohydrate, g/d                        | 323.97 (40.35)    | 316.94 (33.39)    | 312.76 (32.59)    | 309.25 (33.58)    | 302.39 (36.98)    | 288.33 (32.17)    | 281.15 (27.14)    | 277.83 (26.7)     | 276.02 (26.89)    | 272.04 (29.81)    |         |
| Protein, g/d                             | 69.84 (13.22)     | 73.94 (11.39)     | 76.28 (11.43)     | 78.5 (12.3)       | 82.96 (14.4)      | 60.26 (11.3)      | 63.83 (9.92)      | 65.57 (10.04)     | 66.97 (10.41)     | 70.02 (12.16)     |         |
| Saturated fat, g/d                       | 9.48 (4.77)       | 9.81 (3.82)       | 10.02 (3.7)       | 10.16 (3.72)      | 10.38 (4.08)      | 7.83 (3.75)       | 8.28 (3.07)       | 8.46 (3.01)       | 8.46 (3)          | 8.48 (3.23)       |         |
| Monounsaturated fat, g/d                 | 14.3 (7.55)       | 14.7 (6.06)       | 14.91 (5.83)      | 14.98 (5.86)      | 14.98 (6.39)      | 11.94 (5.72)      | 12.56 (4.78)      | 12.73 (4.6)       | 12.68 (4.65)      | 12.43 (4.98)      |         |
| Polyunsaturated fat,                     | 7.48 (3.19)       | 8.07 (2.73)       | 8.38 (2.71)       | 8.65 (2.86)       | 9.21 (3.23)       | 6.56 (2.71)       | 7.2 (2.35)        | 7.54 (2.41)       | 7.73 (2.48)       | 8.22 (3)          |         |

| g/d             |                   |                   |                   |                    |                   |                   |                    |                    |                    |                    |
|-----------------|-------------------|-------------------|-------------------|--------------------|-------------------|-------------------|--------------------|--------------------|--------------------|--------------------|
| Fiber, g/d      | 8.32 (2.26)       | 9.93 (2.07)       | 10.98 (2.17)      | 12.1 (2.46)        | 14.71 (4.08)      | 7.8 (2.2)         | 9.46 (2.09)        | 10.54 (2.19)       | 11.63 (2.4)        | 14.16 (3.48)       |
| Vegetables, g/d | 166.19<br>(82.29) | 254.5 (78.26)     | 315.76<br>(88.02) | 387.32<br>(103.99) | 556.98<br>(196.8) | 147.18<br>(72.84) | 219.34<br>(69.98)  | 269.67<br>(79.09)  | 330.4 (93.11)      | 479.27<br>(175.2)  |
| Fruits, g/d     | 71.99 (72.36)     | 119.93<br>(83.87) | 148.81 (96.4)     | 174.3<br>(114.21)  | 222.2<br>(156.71) | 130.74<br>(98.87) | 208.37<br>(109.36) | 259.22<br>(129.57) | 302.48<br>(154.04) | 392.17<br>(206.39) |
| Red meat, g/d   | 60.75 (43.66)     | 61.09 (35.34)     | 62.11 (35.42)     | 61.54 (36.13)      | 59.41 (39.84)     | 49.29 (34.68)     | 50.63 (30.07)      | 50.32 (29.16)      | 49.12 (29.76)      | 45.52 (32.5)       |
| Poultry, g/d    | 13.54 (18.71)     | 15.13 (16.96)     | 15.49 (16.3)      | 16.12 (18.26)      | 17.14 (20.97)     | 12.74 (17.05)     | 14.59 (15.87)      | 15.31 (16.54)      | 15.33 (16.48)      | 15.67 (18.67)      |
| Fish, g/d       | 37.66 (40.35)     | 45.9 (37.73)      | 50.62 (39.8)      | 54.79 (43.53)      | 62.62 (53.4)      | 37.61 (38.41)     | 45.76 (36.89)      | 49.59 (38.09)      | 53.26 (42.34)      | 59.6 (49.98)       |

Q, quintile; SD, standard deviation.

<sup>a</sup> Income level, four categories: Low: less than ¥10,000 CNY per family per year for women and less than ¥500 CNY per person per month for men; lower middle: ¥10,000-19,999 CNY per family per year for women and ¥500-999 CNY per person per month for men; Upper middle: ¥20,000-29,999 CNY per family per year for women and ¥1,000-1,999 CNY per person per month for men; high: greater than ¥30,000 CNY per family per year for women and more than ¥2,000 CNY per person per month for men.

<sup>b</sup> Smoking status was collapsed into two groups in SWHS.

<sup>c</sup> Use of any vitamin supplement.

<sup>d</sup> Dietary nutrients intake (except for energy) was energy-adjusted by residual methods.

**eTable 2.** Baseline characteristics of study population according to dietary vitamin C intake in men (2002-2012) and women (1997-2012)

|                                          | Men, Mean (SD) or N (%) |               |               |               |               | Women, Mean (SD) or N (%) |               |               |               |               |
|------------------------------------------|-------------------------|---------------|---------------|---------------|---------------|---------------------------|---------------|---------------|---------------|---------------|
|                                          | Q1 (lowest)             | Q2            | Q3            | Q4            | Q5 (highest)  | Q1 (lowest)               | Q2            | Q3            | Q4            | Q5 (highest)  |
| N                                        | 11,947                  | 11,949        | 11,947        | 11,949        | 11,947        | 14,924                    | 14,923        | 14,925        | 14,923        | 14,924        |
| Education                                |                         |               |               |               |               |                           |               |               |               |               |
| Elementary school or less                | 1,175 (9.84)            | 876 (7.33)    | 774 (6.48)    | 675 (5.65)    | 482 (4.03)    | 4,640 (31.09)             | 3,652 (24.47) | 3,064 (20.53) | 2,601 (17.43) | 2,119 (14.2)  |
| Middle school                            | 4,539 (37.99)           | 4,051 (33.9)  | 3,991 (33.41) | 3,778 (31.62) | 3,637 (30.44) | 5,435 (36.42)             | 5,553 (37.21) | 5,445 (36.48) | 5,541 (37.13) | 5,599 (37.52) |
| High school                              | 4,161 (34.83)           | 4,419 (36.98) | 4,300 (35.99) | 4,293 (35.93) | 4,419 (36.99) | 3,351 (22.45)             | 3,780 (25.33) | 4,311 (28.88) | 4,542 (30.44) | 4,835 (32.4)  |
| Professional education/college or higher | 2,072 (17.34)           | 2,603 (21.78) | 2,882 (24.12) | 3,203 (26.81) | 3,409 (28.53) | 1,498 (10.04)             | 1,938 (12.99) | 2,105 (14.1)  | 2,239 (15)    | 2,371 (15.89) |
| Income <sup>a</sup>                      |                         |               |               |               |               |                           |               |               |               |               |
| Low                                      | 1,912 (16)              | 1,529 (12.8)  | 1,397 (11.69) | 1,278 (10.7)  | 1,358 (11.37) | 2,744 (18.39)             | 2,463 (16.5)  | 2,292 (15.36) | 2,255 (15.11) | 2,318 (15.53) |
| Lower middle                             | 5,553 (46.48)           | 5,316 (44.49) | 5,125 (42.9)  | 4,927 (41.23) | 4,568 (38.24) | 6,007 (40.25)             | 5,820 (39)    | 5,610 (37.59) | 5,584 (37.42) | 5,519 (36.98) |
| Upper middle                             | 3,672 (30.74)           | 4,078 (34.13) | 4,251 (35.58) | 4,474 (37.44) | 4,501 (37.67) | 4,045 (27.1)              | 4,228 (28.33) | 4,320 (28.94) | 4,214 (28.24) | 4,152 (27.82) |
| High                                     | 810 (6.78)              | 1026 (8.59)   | 1,174 (9.83)  | 1,270 (10.63) | 1,520 (12.72) | 2,128 (14.26)             | 2,412 (16.16) | 2,703 (18.11) | 2,870 (19.23) | 2,935 (19.67) |
| Occupation                               |                         |               |               |               |               |                           |               |               |               |               |
| House wife                               | -                       | -             | -             | -             | -             | 77 (0.52)                 | 63 (0.42)     | 46 (0.31)     | 49 (0.33)     | 39 (0.26)     |
| Professional, administrator              | 2,475 (20.72)           | 3,055 (25.57) | 3,197 (26.76) | 3,433 (28.73) | 3,552 (29.73) | 3,374 (22.61)             | 4,147 (27.79) | 4,407 (29.53) | 4,654 (31.19) | 4,747 (31.81) |
| Clerical or service worker               | 2,475 (20.72)           | 2,548 (21.32) | 2,635 (22.06) | 2,697 (22.57) | 2,764 (23.14) | 3,042 (20.38)             | 2,983 (19.99) | 3,077 (20.62) | 3,077 (20.62) | 3,229 (21.64) |
| Manual laborer                           | 6,997 (58.57)           | 6,346 (53.11) | 6,115 (51.18) | 5,819 (48.7)  | 5,631 (47.13) | 8,431 (56.49)             | 7,730 (51.8)  | 7,395 (49.55) | 7,143 (47.87) | 6,909 (46.29) |
| History of hypertension                  | 3,340 (27.96)           | 3,513 (29.4)  | 3,633 (30.41) | 3,659 (30.62) | 3,634 (30.42) | 3,702 (24.81)             | 3,554 (23.82) | 3,602 (24.13) | 3,492 (23.4)  | 3,395 (22.75) |
| History of diabetes                      | 535 (4.48)              | 701 (5.87)    | 797 (6.67)    | 818 (6.85)    | 880 (7.37)    | 790 (5.29)                | 763 (5.11)    | 607 (4.07)    | 586 (3.93)    | 526 (3.52)    |

|                                          |                   |                  |                   |                   |                   |                   |                   |                  |                   |                   |
|------------------------------------------|-------------------|------------------|-------------------|-------------------|-------------------|-------------------|-------------------|------------------|-------------------|-------------------|
| History of coronary heart disease        | 519 (4.34)        | 590 (4.94)       | 620 (5.19)        | 654 (5.47)        | 647 (5.42)        | 1,072 (7.18)      | 1,098 (7.36)      | 1,166 (7.81)     | 1,069 (7.16)      | 1,092 (7.32)      |
| History of stroke                        | 474 (3.97)        | 493 (4.13)       | 413 (3.46)        | 456 (3.82)        | 397 (3.32)        | 193 (1.29)        | 197 (1.32)        | 173 (1.16)       | 153 (1.03)        | 156 (1.05)        |
| Smoke status <sup>b</sup>                |                   |                  |                   |                   |                   |                   |                   |                  |                   |                   |
| Never smoker                             | 3,011 (25.2)      | 3,430 (28.71)    | 3,803 (31.83)     | 3,886 (32.52)     | 4,021 (33.66)     | 14,315 (95.92)    | 14,500 (97.17)    | 14,568 (97.61)   | 14,596 (97.81)    | 14,566 (97.6)     |
| Pack-years <20                           | 3,508 (29.36)     | 3,706 (31.02)    | 3,722 (31.15)     | 3,709 (31.04)     | 3,617 (30.28)     | 609 (4.08)        | 423 (2.83)        | 357 (2.39)       | 327 (2.19)        | 358 (2.4)         |
| Pack-years ≥20                           | 5,428 (45.43)     | 4,813 (40.28)    | 4,422 (37.01)     | 4,354 (36.44)     | 4,309 (36.07)     | -                 | -                 | -                | -                 | -                 |
| Alcohol intake                           |                   |                  |                   |                   |                   |                   |                   |                  |                   |                   |
| Never drinker                            | 8,188 (68.54)     | 8,035 (67.24)    | 7,995 (66.92)     | 7,882 (65.96)     | 7,710 (64.54)     | 14,642 (98.11)    | 14,667 (98.28)    | 14,656 (98.2)    | 14,644 (98.13)    | 14,570 (97.63)    |
| <2 drinks/day                            | 2,132 (17.85)     | 2,410 (20.17)    | 2,419 (20.25)     | 2,526 (21.14)     | 2,490 (20.84)     | 263 (1.76)        | 240 (1.61)        | 258 (1.73)       | 264 (1.77)        | 327 (2.19)        |
| ≥2 drinks/day                            | 1,627 (13.62)     | 1,504 (12.59)    | 1,533 (12.83)     | 1,541 (12.9)      | 1,747 (14.62)     | 19 (0.13)         | 16 (0.11)         | 11 (0.07)        | 15 (0.1)          | 27 (0.18)         |
| Supplemental vitamins users <sup>c</sup> | 1,281 (10.72)     | 1,627 (13.62)    | 1,845 (15.44)     | 2,014 (16.85)     | 2,236 (18.72)     | 2,270 (15.21)     | 2,754 (18.45)     | 3,013 (20.19)    | 3,222 (21.59)     | 3,448 (23.1)      |
| Menopause status                         | -                 | -                | -                 | -                 | -                 | 8,389 (56.21)     | 7,745 (51.9)      | 7,353 (49.27)    | 6,974 (46.73)     | 6,518 (43.67)     |
| Hormone replacement therapy              | -                 | -                | -                 | -                 | -                 | 210 (1.41)        | 292 (1.96)        | 309 (2.07)       | 371 (2.49)        | 382 (2.56)        |
| Age at baseline, years                   | 55.3 (9.87)       | 55.58 (9.88)     | 55.59 (9.86)      | 55.49 (9.66)      | 54.74 (9.38)      | 54.25 (9.4)       | 53.28 (9.21)      | 52.54 (9.07)     | 51.9 (8.86)       | 51.13 (8.5)       |
| Body mass index, kg/m <sup>2</sup>       | 23.55 (3.08)      | 23.5 (3.09)      | 23.69 (3.07)      | 23.83 (3.03)      | 24.01 (3.09)      | 24.17 (3.6)       | 23.83 (3.42)      | 23.89 (3.4)      | 23.99 (3.37)      | 24.21 (3.36)      |
| Waist-hip ratio                          | 0.9 (0.06)        | 0.9 (0.06)       | 0.9 (0.06)        | 0.9 (0.06)        | 0.9 (0.06)        | 0.82 (0.06)       | 0.81 (0.05)       | 0.81 (0.05)      | 0.81 (0.05)       | 0.81 (0.05)       |
| Physical activity, MET-h/week            | 57.25 (33.48)     | 57.25 (32.8)     | 58.79 (33.03)     | 61.08 (34.14)     | 63.87 (36.69)     | 104.89 (44.6)     | 104.09 (44.03)    | 104.75 (44.08)   | 107 (45.09)       | 111.52 (47.39)    |
| Dietary intake <sup>d</sup>              |                   |                  |                   |                   |                   |                   |                   |                  |                   |                   |
| Total energy, kcal/d                     | 2,058.92 (494.38) | 1,846.82 (452.2) | 1,816.46 (435.96) | 1,848.74 (443.99) | 1,973.61 (486.81) | 1,808.34 (405.64) | 1,610.85 (362.69) | 1,589.4 (358.52) | 1,626.88 (374.87) | 1,738.48 (410.93) |
| Carbohydrate,                            | 327.14            | 318.15           | 313.32            | 307.6 (32.52)     | 299.08            | 290.67            | 281.79            | 277.61           | 274.28            | 271.03            |

|                          |                |                |                |                 |                 |                |                |                 |                |                 |
|--------------------------|----------------|----------------|----------------|-----------------|-----------------|----------------|----------------|-----------------|----------------|-----------------|
| g/d                      | (40.24)        | (32.21)        | (31.44)        |                 | (37.55)         | (32.96)        | (25.97)        | (25.69)         | (26.76)        | (29.63)         |
| Protein, g/d             | 68.63 (12.72)  | 73.48 (11.04)  | 76.03 (11.01)  | 78.95 (11.75)   | 84.43 (14.4)    | 59.38 (11.3)   | 63.58 (9.47)   | 65.66 (9.57)    | 67.61 (10.41)  | 70.43 (12.19)   |
| Saturated fat, g/d       | 9.17 (4.83)    | 9.7 (3.68)     | 10 (3.59)      | 10.34 (3.67)    | 10.64 (4.18)    | 7.55 (3.83)    | 8.19 (2.97)    | 8.48 (2.91)     | 8.66 (3.01)    | 8.63 (3.24)     |
| Monounsaturated fat, g/d | 13.88 (7.67)   | 14.52 (5.81)   | 14.85 (5.65)   | 15.24 (5.84)    | 15.36 (6.56)    | 11.6 (5.91)    | 12.43 (4.57)   | 12.78 (4.47)    | 12.89 (4.63)   | 12.63 (5.02)    |
| Polyunsaturated fat, g/d | 7.21 (3.12)    | 7.93 (2.63)    | 8.31 (2.56)    | 8.79 (2.8)      | 9.55 (3.32)     | 6.39 (2.77)    | 7.18 (2.29)    | 7.54 (2.31)     | 7.85 (2.46)    | 8.3 (2.99)      |
| Fiber, g/d               | 8.11 (2.19)    | 9.77 (1.86)    | 10.88 (1.94)   | 12.14 (2.12)    | 15.14 (3.9)     | 7.58 (2.21)    | 9.3 (1.89)     | 10.44 (1.91)    | 11.73 (2.11)   | 14.53 (3.26)    |
| Vegetables, g/d          | 148.02 (61.37) | 243.37 (45.64) | 311.18 (54.41) | 392.07 (68.48)  | 586.14 (183.85) | 134.16 (58.78) | 214.69 (50.24) | 269.72 (60.14)  | 336.62 (77.94) | 490.67 (174.92) |
| Fruits, g/d              | 75 (77.13)     | 118.95 (84.76) | 147.1 (97.11)  | 172.64 (111.69) | 223.54 (156.22) | 120.77 (96.12) | 195.98 (99.82) | 248.91 (114.68) | 304.4 (132.75) | 422.92 (203.45) |
| Red meat, g/d            | 59 (43.85)     | 60.56 (34.45)  | 61.59 (34.45)  | 62.44 (36.51)   | 61.31 (40.86)   | 48.12 (35.63)  | 50.07 (28.7)   | 50.42 (28.39)   | 49.76 (29.99)  | 46.51 (33.26)   |
| Poultry, g/d             | 12.87 (18.45)  | 14.73 (16.17)  | 15.53 (16.58)  | 16.47 (18)      | 17.82 (21.66)   | 11.83 (17.06)  | 14.13 (15.12)  | 15.37 (15.7)    | 16.01 (17.05)  | 16.31 (19.29)   |
| Fish, g/d                | 35.1 (39.07)   | 45.33 (36.35)  | 50.03 (39.02)  | 55.75 (43.27)   | 65.38 (54.57)   | 34.36 (37.07)  | 44.54 (35.38)  | 49.83 (36.83)   | 54.99 (42.27)  | 62.1 (51.35)    |

Q, quintile; SD, standard deviation.

<sup>a</sup> Income level, four categories: Low: less than ¥10,000 CNY per family per year for women and less than ¥500 CNY per person per month for men; lower middle: ¥10,000-19,999 CNY per family per year for women and ¥500-999 CNY per person per month for men; Upper middle: ¥20,000-29,999 CNY per family per year for women and ¥1,000-1,999 CNY per person per month for men; high: greater than ¥30,000 CNY per family per year for women and more than ¥2,000 CNY per person per month for men.

<sup>b</sup> Smoking status was collapsed into two groups in SWHS.

<sup>c</sup> Use of any vitamin supplement.

<sup>d</sup> Dietary nutrients intake (except for energy) was energy-adjusted by residual methods.

**eTable 3.** Baseline characteristics of study population according to dietary vitamin E intake in men (2002-2012) and women (1997-2012)

|                                          | Men, Mean (SD) or N (%) |               |               |               |               | Women, Mean (SD) or N (%) |               |               |               |               |
|------------------------------------------|-------------------------|---------------|---------------|---------------|---------------|---------------------------|---------------|---------------|---------------|---------------|
|                                          | Q1 (lowest)             | Q2            | Q3            | Q4            | Q5 (highest)  | Q1 (lowest)               | Q2            | Q3            | Q4            | Q5 (highest)  |
| N                                        | 11,948                  | 11,947        | 11,948        | 11,948        | 11,948        | 14,924                    | 14,923        | 14,924        | 14,925        | 14,923        |
| Education                                |                         |               |               |               |               |                           |               |               |               |               |
| Elementary school or less                | 1,139 (9.53)            | 926 (7.75)    | 728 (6.09)    | 637 (5.33)    | 552 (4.62)    | 4,459 (29.88)             | 3,335 (22.35) | 2,938 (19.69) | 2,706 (18.13) | 2,638 (17.68) |
| Middle school                            | 4,645 (38.88)           | 4,136 (34.62) | 3,870 (32.39) | 3,702 (30.98) | 3,643 (30.49) | 5,766 (38.64)             | 5,629 (37.72) | 5,514 (36.95) | 5,339 (35.77) | 5,325 (35.68) |
| High school                              | 4,193 (35.09)           | 4,244 (35.52) | 4,345 (36.37) | 4,392 (36.76) | 4,418 (36.98) | 3,307 (22.16)             | 4,011 (26.88) | 4,333 (29.03) | 4,530 (30.35) | 4,638 (31.08) |
| Professional education/college or higher | 1,971 (16.5)            | 2,641 (22.11) | 3,005 (25.15) | 3,217 (26.93) | 3,335 (27.91) | 1,392 (9.33)              | 1,948 (13.05) | 2,139 (14.33) | 2,350 (15.75) | 2,322 (15.56) |
| Income <sup>a</sup>                      |                         |               |               |               |               |                           |               |               |               |               |
| Low                                      | 2,042 (17.09)           | 1,449 (12.13) | 1,327 (11.11) | 1,242 (10.4)  | 1,414 (11.83) | 2,798 (18.75)             | 2,423 (16.24) | 2,235 (14.98) | 2,201 (14.75) | 2,415 (16.18) |
| Lower middle                             | 5,601 (46.88)           | 5,229 (43.77) | 5,024 (42.05) | 4,926 (41.23) | 4,709 (39.41) | 6,151 (41.22)             | 5,717 (38.31) | 5,650 (37.86) | 5,539 (37.11) | 5,483 (36.74) |
| Upper middle                             | 3,584 (30)              | 4,195 (35.11) | 4,370 (36.58) | 4,481 (37.5)  | 4,346 (36.37) | 3,991 (26.74)             | 4,299 (28.81) | 4,246 (28.45) | 4,298 (28.8)  | 4,125 (27.64) |
| High                                     | 721 (6.03)              | 1,074 (8.99)  | 1,227 (10.27) | 1,299 (10.87) | 1,479 (12.38) | 1,984 (13.29)             | 2,484 (16.65) | 2,793 (18.71) | 2,887 (19.34) | 2,900 (19.43) |
| Occupation                               |                         |               |               |               |               |                           |               |               |               |               |
| House wife                               | -                       | -             | -             | -             | -             | 60 (0.4)                  | 60 (0.4)      | 60 (0.4)      | 51 (0.34)     | 43 (0.29)     |
| Professional, administrator              | 2,380 (19.92)           | 2,962 (24.79) | 3,312 (27.72) | 3,476 (29.09) | 3,582 (29.98) | 3,174 (21.27)             | 4,104 (27.5)  | 4,558 (30.54) | 4,723 (31.64) | 4,770 (31.96) |
| Clerical or service worker               | 2,443 (20.45)           | 2,594 (21.71) | 2,617 (21.9)  | 2,702 (22.61) | 2,763 (23.13) | 3,168 (21.23)             | 3,019 (20.23) | 3,051 (20.44) | 3,016 (20.21) | 3,154 (21.14) |
| Manual laborer                           | 7,125 (59.63)           | 6,391 (53.49) | 6,019 (50.38) | 5,770 (48.29) | 5,603 (46.89) | 8,522 (57.1)              | 7,740 (51.87) | 7,255 (48.61) | 7,135 (47.81) | 6,956 (46.61) |
| History of                               | 3,360 (28.12)           | 3,414 (28.58) | 3,568         | 3,674 (30.75) | 3,763 (31.49) | 3,418 (22.9)              | 3,374 (22.61) | 3,502 (23.47) | 3,507 (23.5)  | 3,944 (26.43) |





|                          |                     |                      |                      |                      |                      |                      |                      |                      |                      |                      |
|--------------------------|---------------------|----------------------|----------------------|----------------------|----------------------|----------------------|----------------------|----------------------|----------------------|----------------------|
| Total energy, kcal/d     | 2,081.3<br>(473.02) | 1,834.25<br>(451.88) | 1,811.21<br>(441.14) | 1,832.31<br>(434.02) | 1,985.46<br>(498.27) | 1,818.54<br>(407.63) | 1,614.75<br>(357.13) | 1,597.38<br>(356.42) | 1,605.72<br>(366.27) | 1,737.58<br>(419.18) |
| Carbohydrate, g/d        | 341.1 (34.8)        | 323.33 (27.01)       | 313.34<br>(26.69)    | 302.83<br>(27.98)    | 284.7 (36.41)        | 299.99<br>(30.81)    | 286.18<br>(22.82)    | 278.88<br>(22.78)    | 272.21<br>(22.58)    | 258.11<br>(27.82)    |
| Protein, g/d             | 63.55 (9.27)        | 71.36 (8.06)         | 75.92 (8.57)         | 80.73 (9.21)         | 89.95 (13.71)        | 55.58 (9.3)          | 61.87 (7.81)         | 65.18 (8)            | 68.5 (8.48)          | 75.53 (11.45)        |
| Saturated fat, g/d       | 8.21 (4.62)         | 9.46 (3.51)          | 10.08 (3.42)         | 10.71 (3.56)         | 11.39 (4.25)         | 7.07 (3.94)          | 7.99 (2.86)          | 8.45 (2.86)          | 8.75 (2.79)          | 9.25 (3.15)          |
| Monounsaturated fat, g/d | 12.59 (7.38)        | 14.2 (5.6)           | 14.98 (5.5)          | 15.78 (5.74)         | 16.32 (6.75)         | 11.04 (6.14)         | 12.17 (4.47)         | 12.73 (4.46)         | 13.03 (4.35)         | 13.37 (4.86)         |
| Polyunsaturated fat, g/d | 5.52 (2.02)         | 7.14 (1.64)          | 8.13 (1.69)          | 9.25 (1.85)          | 11.76 (3.2)          | 5.09 (1.99)          | 6.5 (1.57)           | 7.28 (1.63)          | 8.13 (1.71)          | 10.27 (2.91)         |
| Fiber, g/d               | 8.23 (2)            | 10.07 (1.96)         | 11.16 (2.25)         | 12.26 (2.6)          | 14.31 (4.39)         | 7.63 (1.98)          | 9.55 (1.85)          | 10.71 (2.12)         | 11.88 (2.47)         | 13.82 (3.85)         |
| Vegetables, g/d          | 218.85<br>(118.13)  | 288.86<br>(121.28)   | 330.08<br>(135.97)   | 376.07<br>(154.21)   | 466.9<br>(227.79)    | 186.89<br>(105.89)   | 248.42<br>(106.57)   | 286.38<br>(119.61)   | 325.76<br>(136.73)   | 398.41<br>(195.21)   |
| Fruits, g/d              | 99.59 (98.79)       | 134.91<br>(101.27)   | 153.13<br>(109.11)   | 168.76<br>(119.89)   | 180.83<br>(146.91)   | 161.77<br>(131.11)   | 231.54<br>(134.3)    | 266.58<br>(146.33)   | 300.86<br>(162.05)   | 332.22<br>(207.87)   |
| Red meat, g/d            | 56.19 (41.82)       | 60.3 (34.28)         | 62.36<br>(34.79)     | 64.04 (36.33)        | 62.01 (42.62)        | 48.61 (36.94)        | 50.42 (29.54)        | 50.73 (29.11)        | 49.32 (27.89)        | 45.79 (32.2)         |
| Poultry, g/d             | 11.26 (16.5)        | 14.56 (16.38)        | 15.97 (17)           | 17.41 (18.02)        | 18.22 (22.35)        | 11.73 (17.18)        | 14.35 (15.39)        | 15.39 (15.87)        | 15.98 (16.26)        | 16.2 (19.5)          |
| Fish, g/d                | 28.85 (30.29)       | 41.89 (32.04)        | 49.68<br>(36.38)     | 58.11 (41.33)        | 73.05 (60.4)         | 29 (31.13)           | 42.88 (32.24)        | 49.66 (35.7)         | 56.71 (40.67)        | 67.55 (55.41)        |

Q, quintile; SD, standard deviation.

<sup>a</sup> Income level, four categories: Low: less than ¥10,000 CNY per family per year for women and less than ¥500 CNY per person per month for men; lower middle: ¥10,000-19,999 CNY per family per year for women and ¥500-999 CNY per person per month for men; Upper middle: ¥20,000-29,999 CNY per family per year for women and ¥1,000-1,999 CNY per person per month for men; high: greater than ¥30,000 CNY per family per year for women and more than ¥2,000 CNY per person per month for men.

<sup>b</sup> Smoking status was collapsed into two groups in SWHS.

<sup>c</sup> Use of any vitamin supplement.

<sup>d</sup> Dietary nutrients intake (except for energy) was energy-adjusted by residual methods.

**eTable 4.** Results of sensitivity analysis between dietary antioxidant vitamins intake with all-cause mortality in men (2002-2012) and women (1997-2012)<sup>a</sup>

| <b>Men</b>                  |                 |       |                      |                      |                      | <b>Women</b>                |                 |       |                      |                      |                      |
|-----------------------------|-----------------|-------|----------------------|----------------------|----------------------|-----------------------------|-----------------|-------|----------------------|----------------------|----------------------|
| Vitamins                    | Median          | Cases | Model 1 <sup>b</sup> | Model 2 <sup>c</sup> | Model 3 <sup>d</sup> | Vitamins                    | Median          | Cases | Model 1 <sup>b</sup> | Model 2 <sup>c</sup> | Model 3 <sup>d</sup> |
| <b>Non-supplement users</b> |                 |       |                      |                      |                      | <b>Non-supplement users</b> |                 |       |                      |                      |                      |
| Carotene                    | 1,387.86        | 915   | 1.00 (reference)     | 1.00 (reference)     | 1.00 (reference)     | Carotene                    | 1,327.29        | 1,201 | 1.00 (reference)     | 1.00 (reference)     | 1.00 (reference)     |
|                             | 2,174.07        | 693   | 0.75 (0.68-0.83)     | 0.82 (0.75-0.91)     | 0.82 (0.74-0.91)     |                             | 2,042.15        | 989   | 0.90 (0.83-0.98)     | 0.94 (0.86-1.02)     | 0.94 (0.86-1.02)     |
|                             | 2,832.69        | 632   | 0.71 (0.64-0.78)     | 0.82 (0.74-0.91)     | 0.82 (0.73-0.92)     |                             | 2,630.01        | 876   | 0.89 (0.81-0.97)     | 0.94 (0.86-1.03)     | 0.94 (0.86-1.04)     |
|                             | 3,611.56        | 580   | 0.66 (0.59-0.73)     | 0.77 (0.69-0.85)     | 0.77 (0.68-0.88)     |                             | 3,333.08        | 864   | 0.91 (0.83-0.99)     | 0.95 (0.87-1.03)     | 0.95 (0.85-1.06)     |
|                             | 5,097.97        | 563   | 0.68 (0.61-0.76)     | 0.80 (0.72-0.89)     | 0.8 (0.69-0.93)      |                             | 4,594.06        | 772   | 0.88 (0.80-0.96)     | 0.92 (0.84-1.00)     | 0.92 (0.81-1.04)     |
|                             | P for trend     |       | <0.001               | <0.001               | 0.006                |                             | P for trend     |       | 0.010                | 0.100                | 0.214                |
|                             | P for nonlinear |       | <0.001               | <0.001               | <0.001               |                             | P for nonlinear |       | <0.001               | 0.05                 | 0.055                |
| Vitamin C                   | 44.29           | 913   | 1.00 (reference)     | 1.00 (reference)     | 1.00 (reference)     | Vitamin C                   | 42.24           | 1,291 | 1.00 (reference)     | 1.00 (reference)     | 1.00 (reference)     |
|                             | 67.84           | 736   | 0.79 (0.72-0.87)     | 0.86 (0.78-0.95)     | 0.85 (0.77-0.94)     |                             | 64.34           | 994   | 0.84 (0.77-0.92)     | 0.87 (0.80-0.94)     | 0.87 (0.80-0.94)     |
|                             | 86.69           | 651   | 0.71 (0.64-0.79)     | 0.82 (0.74-0.90)     | 0.81 (0.72-0.92)     |                             | 81.88           | 926   | 0.88 (0.81-0.96)     | 0.94 (0.86-1.02)     | 0.94 (0.85-1.04)     |
|                             | 108.69          | 564   | 0.65 (0.58-0.72)     | 0.75 (0.68-0.84)     | 0.75 (0.65-0.86)     |                             | 102.88          | 810   | 0.86 (0.78-0.94)     | 0.93 (0.85-1.02)     | 0.93 (0.83-1.05)     |
|                             | 151.71          | 519   | 0.68 (0.61-0.76)     | 0.81 (0.72-0.90)     | 0.79 (0.68-0.93)     |                             | 142.55          | 681   | 0.83 (0.76-0.92)     | 0.89 (0.81-0.98)     | 0.89 (0.78-1.02)     |
|                             | P for trend     |       | <0.001               | <0.001               | 0.008                |                             | P for trend     |       | 0.001                | 0.093                | 0.151                |
|                             | P for nonlinear |       | <0.001               | <0.001               | 0.001                |                             | P for nonlinear |       | 0.095                | 0.94                 | 0.876                |
| Vitamin E                   | 8.81            | 732   | 1.00 (reference)     | 1.00 (reference)     | 1.00 (reference)     | Vitamin E                   | 8.15            | 1,110 | 1.00 (reference)     | 1.00 (reference)     | 1.00 (reference)     |
|                             | 11.70           | 706   | 0.89 (0.80-0.99)     | 0.95 (0.85-1.05)     | 0.98 (0.88-1.09)     |                             | 10.68           | 998   | 0.99 (0.91-1.08)     | 1.02 (0.94-1.12)     | 1.03 (0.94-1.12)     |
|                             | 13.85           | 643   | 0.84 (0.75-0.94)     | 0.93 (0.83-1.03)     | 0.97 (0.87-1.09)     |                             | 12.53           | 918   | 0.99 (0.91-1.09)     | 1.03 (0.94-1.12)     | 1.04 (0.95-1.14)     |
|                             | 16.28           | 680   | 0.89 (0.80-0.99)     | 0.97 (0.87-1.08)     | 1.04 (0.93-1.16)     |                             | 14.58           | 847   | 0.95 (0.87-1.04)     | 0.98 (0.90-1.08)     | 1.00 (0.90-1.10)     |
|                             | 20.95           | 622   | 0.93 (0.83-1.03)     | 1.00 (0.89-1.11)     | 1.08 (0.96-1.22)     |                             | 18.43           | 829   | 1.00 (0.91-1.10)     | 0.97 (0.89-1.07)     | 0.99 (0.90-1.09)     |
|                             | P for trend     |       | 0.284                | 0.848                | 0.09                 |                             | P for trend     |       | 0.797                | 0.398                | 0.679                |
|                             | P for nonlinear |       | <0.001               | 0.003                | 0.027                |                             | P for nonlinear |       | 0.078                | 0.796                | 0.649                |
| <b>Follow-up years ≥3</b>   |                 |       |                      |                      |                      | <b>Follow-up years ≥3</b>   |                 |       |                      |                      |                      |
| Carotene                    | 1,392.91        | 751   | 1.00 (reference)     | 1.00 (reference)     | 1.00 (reference)     | Carotene                    | 1,333.55        | 1,281 | 1.00 (reference)     | 1.00 (reference)     | 1.00 (reference)     |
|                             | 2,175.91        | 637   | 0.80 (0.72-0.89)     | 0.87 (0.78-0.96)     | 0.87 (0.79-0.97)     |                             | 2,042.90        | 1,065 | 0.87 (0.80-0.95)     | 0.91 (0.84-0.99)     | 0.92 (0.85-1.00)     |
|                             | 2,832.69        | 587   | 0.74 (0.67-0.83)     | 0.85 (0.76-0.95)     | 0.89 (0.79-1.00)     |                             | 2,631.89        | 1,000 | 0.88 (0.81-0.96)     | 0.95 (0.88-1.04)     | 0.98 (0.89-1.07)     |
|                             | 3,615.80        | 559   | 0.70 (0.63-0.78)     | 0.81 (0.72-0.90)     | 0.88 (0.77-1.02)     |                             | 3,330.16        | 959   | 0.87 (0.80-0.95)     | 0.91 (0.84-0.99)     | 0.95 (0.86-1.06)     |
|                             | 5,101.73        | 590   | 0.74 (0.66-0.82)     | 0.85 (0.76-0.95)     | 0.95 (0.81-1.10)     |                             | 4,601.27        | 873   | 0.83 (0.76-0.90)     | 0.87 (0.80-0.95)     | 0.92 (0.82-1.04)     |
|                             | P for trend     |       | <0.001               | 0.005                | 0.705                |                             | P for trend     |       | <0.001               | 0.005                | 0.249                |

|                                       |                 |     |                  |                  |                  |                                               |                 |       |                  |                  |                  |
|---------------------------------------|-----------------|-----|------------------|------------------|------------------|-----------------------------------------------|-----------------|-------|------------------|------------------|------------------|
|                                       | P for nonlinear |     | <0.001           | 0.002            | 0.024            |                                               | P for nonlinear |       | <0.001           | 0.041            | 0.092            |
| Vitamin C                             | 44.53           | 770 | 1.00 (reference) | 1.00 (reference) | 1.00 (reference) | Vitamin C                                     | 42.47           | 1,377 | 1.00 (reference) | 1.00 (reference) | 1.00 (reference) |
|                                       | 67.95           | 670 | 0.81 (0.73-0.90) | 0.88 (0.79-0.98) | 0.88 (0.79-0.98) |                                               | 64.40           | 1,104 | 0.83 (0.77-0.90) | 0.87 (0.80-0.94) | 0.87 (0.80-0.94) |
|                                       | 86.71           | 598 | 0.71 (0.64-0.80) | 0.81 (0.73-0.91) | 0.81 (0.71-0.92) |                                               | 81.95           | 1,032 | 0.85 (0.78-0.92) | 0.91 (0.84-0.99) | 0.91 (0.82-1.00) |
|                                       | 108.70          | 543 | 0.66 (0.59-0.74) | 0.76 (0.68-0.85) | 0.75 (0.64-0.87) |                                               | 102.85          | 902   | 0.81 (0.74-0.88) | 0.89 (0.82-0.97) | 0.88 (0.79-0.99) |
|                                       | 151.75          | 543 | 0.71 (0.64-0.79) | 0.83 (0.74-0.93) | 0.81 (0.70-0.96) |                                               | 142.73          | 763   | 0.77 (0.70-0.84) | 0.84 (0.77-0.92) | 0.83 (0.73-0.94) |
|                                       | P for trend     |     | <0.001           | <0.001           | 0.038            |                                               | P for trend     |       | <0.001           | 0.001            | 0.009            |
|                                       | P for nonlinear |     | <0.001           | <0.001           | 0.001            |                                               | P for nonlinear |       | 0.005            | 0.402            | 0.308            |
| Vitamin E                             | 8.85            | 627 | 1.00 (reference) | 1.00 (reference) | 1.00 (reference) | Vitamin E                                     | 8.19            | 1,156 | 1.00 (reference) | 1.00 (reference) | 1.00 (reference) |
|                                       | 11.72           | 640 | 0.91 (0.81-1.01) | 0.96 (0.86-1.07) | 0.98 (0.88-1.10) |                                               | 10.70           | 1,071 | 0.96 (0.88-1.04) | 1.00 (0.92-1.09) | 1.01 (0.92-1.10) |
|                                       | 13.86           | 584 | 0.81 (0.72-0.91) | 0.89 (0.79-0.99) | 0.93 (0.82-1.04) |                                               | 12.54           | 1,030 | 0.94 (0.87-1.03) | 0.99 (0.91-1.08) | 1.01 (0.92-1.10) |
|                                       | 16.28           | 638 | 0.85 (0.76-0.96) | 0.93 (0.83-1.04) | 0.99 (0.88-1.12) |                                               | 14.59           | 949   | 0.88 (0.81-0.96) | 0.93 (0.85-1.01) | 0.95 (0.86-1.04) |
|                                       | 20.90           | 635 | 0.91 (0.82-1.02) | 0.97 (0.87-1.09) | 1.06 (0.94-1.19) |                                               | 18.47           | 972   | 0.92 (0.85-1.00) | 0.91 (0.83-0.99) | 0.93 (0.85-1.02) |
|                                       |                 |     | 0.135            | 0.715            | 0.282            |                                               | P for trend     |       | 0.019            | 0.008            | 0.07             |
|                                       |                 |     | <0.001           | 0.005            | 0.049            |                                               | P for nonlinear |       | <0.001           | 0.098            | 0.203            |
| <b>Excluded diabetes, CHD, stroke</b> |                 |     |                  |                  |                  | <b>Excluded diabetes, CHD, stroke, cancer</b> |                 |       |                  |                  |                  |
| Carotene                              | 1,386.66        | 718 | 1.00 (reference) | 1.00 (reference) | 1.00 (reference) | Carotene                                      | 1,332.27        | 973   | 1.00 (reference) | 1.00 (reference) | 1.00 (reference) |
|                                       | 2,174.69        | 574 | 0.78 (0.70-0.88) | 0.86 (0.77-0.96) | 0.85 (0.76-0.95) |                                               | 2,042.19        | 814   | 0.9 (0.82-0.99)  | 0.96 (0.87-1.05) | 0.96 (0.87-1.06) |
|                                       | 2,831.15        | 511 | 0.70 (0.62-0.78) | 0.80 (0.71-0.90) | 0.80 (0.71-0.91) |                                               | 2,631.54        | 717   | 0.86 (0.78-0.95) | 0.93 (0.84-1.02) | 0.93 (0.83-1.03) |
|                                       | 3,614.13        | 467 | 0.65 (0.58-0.73) | 0.76 (0.68-0.86) | 0.78 (0.67-0.90) |                                               | 3,330.69        | 691   | 0.86 (0.78-0.95) | 0.93 (0.84-1.03) | 0.92 (0.81-1.04) |
|                                       | 5,085.49        | 482 | 0.68 (0.61-0.77) | 0.82 (0.73-0.93) | 0.83 (0.71-0.98) |                                               | 4,588.46        | 620   | 0.82 (0.74-0.91) | 0.9 (0.81-1.00)  | 0.89 (0.78-1.03) |
|                                       | P for trend     |     | <0.001           | 0.001            | 0.052            |                                               | P for trend     |       | <0.001           | 0.043            | 0.124            |
|                                       | P for nonlinear |     | <0.001           | 0.001            | 0.003            |                                               | P for nonlinear |       | <0.001           | 0.019            | 0.023            |
| Vitamin C                             | 44.31           | 726 | 1.00 (reference) | 1.00 (reference) | 1.00 (reference) | Vitamin C                                     | 42.36           | 1,039 | 1.00 (reference) | 1.00 (reference) | 1.00 (reference) |
|                                       | 67.92           | 598 | 0.80 (0.72-0.89) | 0.87 (0.78-0.98) | 0.86 (0.77-0.97) |                                               | 64.40           | 758   | 0.79 (0.71-0.86) | 0.83 (0.76-0.92) | 0.84 (0.76-0.93) |
|                                       | 86.73           | 526 | 0.70 (0.63-0.79) | 0.80 (0.71-0.89) | 0.78 (0.68-0.89) |                                               | 81.99           | 780   | 0.88 (0.80-0.97) | 0.95 (0.86-1.04) | 0.95 (0.85-1.06) |
|                                       | 108.73          | 450 | 0.62 (0.55-0.70) | 0.74 (0.66-0.84) | 0.71 (0.61-0.84) |                                               | 102.87          | 681   | 0.83 (0.75-0.92) | 0.92 (0.83-1.01) | 0.92 (0.81-1.05) |
|                                       | 151.63          | 452 | 0.67 (0.60-0.75) | 0.8 (0.71-0.91)  | 0.76 (0.64-0.90) |                                               | 142.63          | 557   | 0.75 (0.68-0.83) | 0.84 (0.75-0.93) | 0.85 (0.73-0.98) |
|                                       |                 |     | <0.001           | <0.001           | 0.005            |                                               | P for trend     |       | <0.001           | 0.012            | 0.043            |
|                                       |                 |     | <0.001           | 0.003            | 0.005            |                                               | P for nonlinear |       | 0.066            | 0.909            | 0.87             |
| Vitamin E                             | 8.83            | 589 | 1.00 (reference) | 1.00 (reference) | 1.00 (reference) | Vitamin E                                     | 8.18            | 952   | 1.00 (reference) | 1.00 (reference) | 1.00 (reference) |
|                                       | 11.71           | 559 | 0.88 (0.78-0.99) | 0.93 (0.83-1.05) | 0.96 (0.85-1.08) |                                               | 10.69           | 818   | 0.94 (0.86-1.03) | 0.99 (0.90-1.09) | 0.99 (0.90-1.09) |
|                                       | 13.86           | 518 | 0.83 (0.73-0.93) | 0.91 (0.80-1.02) | 0.95 (0.84-1.07) |                                               | 12.53           | 791   | 0.94 (0.85-1.04) | 1.03 (0.94-1.14) | 1.03 (0.93-1.14) |

|                                                          |                 |      |                  |                  |                  |                                                          |                 |       |                  |                  |                  |
|----------------------------------------------------------|-----------------|------|------------------|------------------|------------------|----------------------------------------------------------|-----------------|-------|------------------|------------------|------------------|
|                                                          | 16.27           | 564  | 0.88 (0.78-0.98) | 0.98 (0.87-1.10) | 1.05 (0.93-1.19) |                                                          | 14.59           | 673   | 0.83 (0.76-0.92) | 0.92 (0.83-1.02) | 0.92 (0.83-1.03) |
|                                                          | 20.90           | 522  | 0.89 (0.79-1.00) | 0.99 (0.88-1.12) | 1.08 (0.95-1.23) |                                                          | 18.40           | 581   | 0.79 (0.72-0.88) | 0.88 (0.80-0.98) | 0.89 (0.79-0.99) |
|                                                          | P for trend     |      | 0.123            | 0.774            | 0.091            |                                                          | P for trend     |       | <0.001           | 0.009            | 0.017            |
|                                                          | P for nonlinear |      | <0.001           | 0.025            | 0.131            |                                                          | P for nonlinear |       | 0.01             | 0.359            | 0.398            |
| <b>Additionally adjusted other nutrients<sup>e</sup></b> |                 |      |                  |                  |                  | <b>Additionally adjusted other nutrients<sup>e</sup></b> |                 |       |                  |                  |                  |
| Carotene                                                 | 1,392.62        | 1040 | 1.00 (reference) | 1.00 (reference) | 1.00 (reference) | Carotene                                                 | 1,333.63        | 1,465 | 1.00 (reference) | 1.00 (reference) | 1.00 (reference) |
|                                                          | 2,175.57        | 850  | 0.77 (0.70-0.84) | 0.84 (0.77-0.93) | 0.85 (0.77-0.93) |                                                          | 2,042.42        | 1,235 | 0.88 (0.82-0.95) | 0.93 (0.86-1.01) | 0.93 (0.86-1.01) |
|                                                          | 2,831.91        | 782  | 0.71 (0.65-0.78) | 0.84 (0.76-0.93) | 0.86 (0.77-0.95) |                                                          | 2,632.21        | 1,128 | 0.87 (0.81-0.94) | 0.94 (0.86-1.03) | 0.95 (0.87-1.04) |
|                                                          | 3,615.24        | 727  | 0.66 (0.60-0.72) | 0.78 (0.70-0.87) | 0.82 (0.72-0.93) |                                                          | 3,330.21        | 1,087 | 0.86 (0.80-0.93) | 0.90 (0.82-0.99) | 0.92 (0.83-1.02) |
|                                                          | 5,099.66        | 771  | 0.71 (0.64-0.78) | 0.84 (0.75-0.95) | 0.89 (0.78-1.03) |                                                          | 4,602.66        | 994   | 0.82 (0.76-0.89) | 0.85 (0.77-0.94) | 0.87 (0.77-0.98) |
|                                                          | P for trend     |      | <0.001           | 0.012            | 0.243            |                                                          | P for trend     |       | <0.001           | 0.003            | 0.027            |
|                                                          | P for nonlinear |      | <0.001           | <0.001           | 0.001            |                                                          | P for nonlinear |       | <0.001           | 0.012            | 0.022            |
| Vitamin C                                                | 44.55           | 1044 | 1.00 (reference) | 1.00 (reference) | 1.00 (reference) | Vitamin C                                                | 42.51           | 1,575 | 1.00 (reference) | 1.00 (reference) | 1.00 (reference) |
|                                                          | 67.95           | 905  | 0.80 (0.73-0.88) | 0.88 (0.80-0.96) | 0.88 (0.80-0.97) |                                                          | 64.40           | 1,257 | 0.83 (0.77-0.89) | 0.86 (0.80-0.93) | 0.86 (0.80-0.93) |
|                                                          | 86.73           | 791  | 0.69 (0.63-0.76) | 0.80 (0.72-0.88) | 0.81 (0.72-0.91) |                                                          | 81.95           | 1,172 | 0.84 (0.78-0.91) | 0.90 (0.82-0.98) | 0.90 (0.81-0.99) |
|                                                          | 108.70          | 725  | 0.65 (0.59-0.71) | 0.75 (0.67-0.84) | 0.77 (0.67-0.88) |                                                          | 102.86          | 1,040 | 0.81 (0.75-0.88) | 0.87 (0.79-0.96) | 0.87 (0.78-0.98) |
|                                                          | 151.69          | 705  | 0.69 (0.63-0.76) | 0.80 (0.71-0.92) | 0.82 (0.70-0.96) |                                                          | 142.72          | 865   | 0.76 (0.70-0.83) | 0.79 (0.70-0.88) | 0.79 (0.69-0.90) |
|                                                          | P for trend     |      | <0.001           | 0.001            | 0.053            |                                                          | P for trend     |       | <0.001           | <0.001           | 0.001            |
|                                                          | P for nonlinear |      | <0.001           | <0.001           | 0.003            |                                                          | P for nonlinear |       | 0.003            | 0.612            | 0.585            |
| Vitamin E                                                | 8.85            | 842  | 1.00 (reference) | 1.00 (reference) | 1.00 (reference) | Vitamin E                                                | 8.19            | 1,302 | 1.00 (reference) | 1.00 (reference) | 1.00 (reference) |
|                                                          | 11.72           | 861  | 0.90 (0.82-0.99) | 1.01 (0.90-1.12) | 1.01 (0.91-1.13) |                                                          | 10.70           | 1,210 | 0.96 (0.89-1.04) | 1.02 (0.93-1.11) | 1.02 (0.93-1.11) |
|                                                          | 13.86           | 802  | 0.83 (0.75-0.91) | 0.99 (0.88-1.13) | 1.00 (0.89-1.14) |                                                          | 12.54           | 1,190 | 0.96 (0.89-1.04) | 1.03 (0.93-1.14) | 1.04 (0.94-1.15) |
|                                                          | 16.28           | 858  | 0.86 (0.78-0.94) | 1.05 (0.91-1.20) | 1.07 (0.93-1.22) |                                                          | 14.59           | 1,099 | 0.90 (0.83-0.98) | 0.96 (0.86-1.07) | 0.97 (0.86-1.08) |
|                                                          | 20.91           | 807  | 0.88 (0.80-0.97) | 1.06 (0.90-1.24) | 1.09 (0.93-1.28) |                                                          | 18.48           | 1,108 | 0.93 (0.86-1.01) | 0.90 (0.79-1.02) | 0.91 (0.80-1.03) |
|                                                          | P for trend     |      | 0.014            | 0.411            | 0.233            |                                                          | P for trend     |       | 0.036            | 0.04             | 0.065            |
|                                                          | P for nonlinear |      | <0.001           | 0.174            | 0.247            |                                                          | P for nonlinear |       | <0.001           | 0.7              | 0.766            |

Q, quintile; CHD, coronary artery heart disease.

<sup>a</sup> Dietary antioxidant vitamins and the intakes of all nutrients and foods were adjusted for total energy using the density method.

<sup>b</sup> Model 1 adjusted for age (per 5-y) and energy (quartiles).

<sup>c</sup> Model 2 adjusted for age (per 5-y intervals), energy (quartiles), birth cohort (per 10-y intervals), education (4 categories), income (4 categories), occupation (3 categories for men, 4 for women), smoking status (3 categories for men, 2 for women), alcohol intake (3 categories), body mass index (4 categories), waist-hip ratio (3 categories), physical activity (quartiles), history of hypertension (yes/no), diabetes (yes/no), coronary heart disease (yes/no), stroke(yes/no), vitamin supplements use (yes/no), menopause status (yes/no, women only), hormone replacement therapy (yes/no, women only).

<sup>d</sup> Model 3 additionally mutually adjusted for other two vitamins.

<sup>e</sup> In this section, we additionally adjusted other nutrients (dietary fiber, monounsaturated fatty acid, polyunsaturated fatty acid) in model 2 and 3.

**eTable 5.** Association of energy-adjusted (density method) dietary antioxidant vitamins intake with all-cause mortality in men (2002-2012) and women (1997-2012)

| Variable       |                                | Intake of energy-adjusted dietary antioxidant vitamins <sup>a</sup> |                  |                  |                  |                  | P for trend |
|----------------|--------------------------------|---------------------------------------------------------------------|------------------|------------------|------------------|------------------|-------------|
|                |                                | Q1 (lowest)                                                         | Q2               | Q3               | Q4               | Q5 (highest)     |             |
| <b>Men</b>     |                                |                                                                     |                  |                  |                  |                  |             |
| Total carotene | Median intake, µg/1,000 kcal·d | 755.05                                                              | 1,168.93         | 1,527.56         | 1,957.92         | 2,767.35         |             |
|                | Person-years                   | 98,462                                                              | 98,841           | 98,649           | 99,064           | 100,314          |             |
|                | Number of deaths               | 1,081                                                               | 801              | 749              | 742              | 797              |             |
|                | Model 1 <sup>b</sup>           | 1.00                                                                | 0.77 (0.70-0.84) | 0.72 (0.65-0.79) | 0.68 (0.62-0.75) | 0.69 (0.63-0.75) | <0.001      |
|                | Model 2 <sup>c</sup>           | 1.00                                                                | 0.84 (0.77-0.92) | 0.83 (0.75-0.91) | 0.81 (0.73-0.89) | 0.81 (0.74-0.89) | <0.001      |
|                | Model 3 <sup>d</sup>           | 1.00                                                                | 0.84 (0.77-0.92) | 0.84 (0.76-0.93) | 0.83 (0.74-0.94) | 0.84 (0.74-0.96) | 0.032       |
| Vitamin C      | Median intake, mg/1,000 kcal·d | 24.31                                                               | 36.45            | 46.71            | 58.78            | 82.10            |             |
|                | Person-years                   | 98086                                                               | 98,491           | 98,676           | 99,144           | 100,933          |             |
|                | Number of deaths               | 1114                                                                | 842              | 756              | 730              | 728              |             |
|                | Model 1 <sup>b</sup>           | 1.00                                                                | 0.79 (0.72-0.86) | 0.69 (0.63-0.76) | 0.67 (0.61-0.73) | 0.68 (0.62-0.74) | <0.001      |
|                | Model 2 <sup>c</sup>           | 1.00                                                                | 0.87 (0.80-0.96) | 0.81 (0.73-0.89) | 0.79 (0.72-0.87) | 0.81 (0.73-0.89) | <0.001      |
|                | Model 3 <sup>d</sup>           | 1.00                                                                | 0.87 (0.80-0.96) | 0.81 (0.73-0.90) | 0.80 (0.70-0.90) | 0.81 (0.71-0.93) | 0.015       |
| Vitamin E      | Median intake, mg/1,000 kcal·d | 4.83                                                                | 6.27             | 7.45             | 8.78             | 11.23            |             |
|                | Person-years                   | 97670                                                               | 98,149           | 99,052           | 99,333           | 101,126          |             |
|                | Number of deaths               | 955                                                                 | 786              | 758              | 832              | 839              |             |
|                | Model 1 <sup>b</sup>           | 1.00                                                                | 0.85 (0.78-0.94) | 0.81 (0.73-0.89) | 0.83 (0.76-0.91) | 0.86 (0.78-0.94) | 0.005       |
|                | Model 2 <sup>c</sup>           | 1.00                                                                | 0.92 (0.84-1.01) | 0.89 (0.81-0.98) | 0.93 (0.85-1.03) | 0.93 (0.84-1.02) | 0.232       |
|                | Model 3 <sup>d</sup>           | 1.00                                                                | 0.95 (0.86-1.04) | 0.93 (0.84-1.03) | 0.99 (0.89-1.09) | 1.00 (0.90-1.10) | 0.728       |
| <b>Women</b>   |                                |                                                                     |                  |                  |                  |                  |             |
| Total carotene | Median intake, µg/1,000 kcal·d | 824.81                                                              | 1,248.38         | 1,613.72         | 2,043.94         | 2,829.34         |             |
|                | Person-years                   | 204,884                                                             | 206,864          | 206,378          | 205,935          | 205,135          |             |
|                | Number of deaths               | 1,559                                                               | 1,151            | 1,077            | 1,076            | 1,046            |             |
|                | Model 1 <sup>b</sup>           | 1.00                                                                | 0.85 (0.79-0.92) | 0.85 (0.78-0.92) | 0.86 (0.80-0.93) | 0.81 (0.75-0.87) | <0.001      |
|                | Model 2 <sup>c</sup>           | 1.00                                                                | 0.9 (0.83-0.97)  | 0.91 (0.84-0.99) | 0.92 (0.85-0.99) | 0.85 (0.78-0.92) | <0.001      |
|                | Model 3 <sup>d</sup>           | 1.00                                                                | 0.9 (0.84-0.98)  | 0.93 (0.85-1.01) | 0.95 (0.86-1.04) | 0.88 (0.79-0.98) | 0.047       |
| Vitamin C      | Median intake, mg/1,000 kcal·d | 26.35                                                               | 39.06            | 49.99            | 63.05            | 86.99            | .           |

|           |                                |         |                  |                  |                  |                  |        |
|-----------|--------------------------------|---------|------------------|------------------|------------------|------------------|--------|
|           | Person-years                   | 203,467 | 206,444          | 206,247          | 206,320          | 206,718          | .      |
|           | Number of deaths               | 1,738   | 1,165            | 1,104            | 1,011            | 891              | .      |
|           | Model 1 <sup>b</sup>           | 1.00    | 0.82 (0.76-0.88) | 0.83 (0.77-0.90) | 0.81 (0.75-0.87) | 0.76 (0.70-0.82) | <0.001 |
|           | Model 2 <sup>c</sup>           | 1.00    | 0.87 (0.80-0.93) | 0.9 (0.84-0.97)  | 0.89 (0.83-0.97) | 0.84 (0.77-0.91) | <0.001 |
|           | Model 3 <sup>d</sup>           | 1.00    | 0.86 (0.80-0.93) | 0.89 (0.82-0.98) | 0.88 (0.79-0.98) | 0.83 (0.74-0.93) | 0.006  |
| Vitamin E | Median intake, mg/1,000 kcal·d | 5.02    | 6.48             | 7.64             | 8.92             | 11.30            |        |
|           | Person-years                   | 204,990 | 206,511          | 206,456          | 206,082          | 205,156          |        |
|           | Number of deaths               | 1,484   | 1,176            | 1,067            | 1,072            | 1,110            |        |
|           | Model 1 <sup>b</sup>           | 1.00    | 0.96 (0.89-1.03) | 0.9 (0.83-0.97)  | 0.91 (0.84-0.99) | 0.91 (0.84-0.98) | 0.009  |
|           | Model 2 <sup>c</sup>           | 1.00    | 0.99 (0.91-1.07) | 0.95 (0.87-1.03) | 0.96 (0.88-1.04) | 0.89 (0.82-0.96) | 0.003  |
|           | Model 3 <sup>d</sup>           | 1.00    | 1 (0.92-1.08)    | 0.96 (0.89-1.05) | 0.98 (0.90-1.07) | 0.92 (0.84-1.00) | 0.053  |

Q, quintile.

<sup>a</sup> Dietary antioxidant vitamins and the intakes of all nutrients and foods were adjusted for total energy using the density method.

<sup>b</sup> Model 1 adjusted for age (per 5-y) and energy (quartiles).

<sup>c</sup> Model 2 adjusted for age (per 5-y intervals), energy (quartiles), birth cohort (per 10-y intervals), education (4 categories), income (4 categories), occupation (3 categories for men, 4 for women), smoking status (3 categories for men, 2 for women), alcohol intake (3 categories), body mass index (4 categories), waist-hip ratio (3 categories), physical activity (quartiles), history of hypertension (yes/no), diabetes (yes/no), coronary heart disease (yes/no), stroke (yes/no), vitamin supplements use (yes/no), menopause status (yes/no, women only), hormone replacement therapy (yes/no, women only).

<sup>d</sup> Model 3 additionally mutually adjusted for other two vitamins.
